# Supplementary material
Source: PubMed Central journal article supplement (PMC5984995)
Supplement: mmc1.pdf [file mmc1.pdf]

**Biophysical Journal, Volume 114**

**Supplemental Information**

**Quantitative Characterization of Metastability and Heterogeneity of  
Amyloid Aggregates**

**Timir Baran Sil, Bankanidhi Sahoo, Subhas Chandra Bera, and Kanchan Garai**

## Supplementary Information

### Quantitative Characterization of Metastability and Heterogeneity of Amyloid Aggregates

Timir Baran Sil, Bankanidhi Sahoo, Subhas Chandra Bera and Kanchan Garai\*

Tata Institute of Fundamental Research, Hyderabad, India

#### Characterization of aggregation of TMR-A $\beta$ 42

##### *Kinetics of aggregation of TMR-A $\beta$ 42:*

An aliquot (1 mL) of 1.3  $\mu$ M of TMR-A $\beta$ 42 was aggregated in 20 mM phosphate containing 150 mM NaCl, 5 mM  $\beta$ Me and 1 mM EDTA, pH 7.4 at 37 °C with continuous stirring. Aggregation was monitored using TMR fluorescence continuously in a fluorometer (PTI). Excitation and emission monochromators were set at 550 nm and 585 nm, respectively. Time course of aggregation of TMR-A $\beta$ 42 presented in Figure S1A shows three distinct phases, oligomerization, intermediate or 'lag' and fibril growth phase. It may be seen that the kinetic data presented here are similar to the data reported previously by Garai and Frieden (1).

##### *Characterization of secondary structure of TMR-A $\beta$ 42 amyloids by circular dichroism (CD):*

CD spectra of the monomeric and the aggregated TMR-A $\beta$ 42 prepared in 10 mM phosphate buffer were measured in a spectropolarimeter (Jasco). The aggregated TMR-A $\beta$  sample was pelleted down by centrifugation at 16000 $\times$ g, then the pellet was resuspended in 10 mM phosphate buffer, pH 7.4. Figure S1B shows a peak at 200 nm for the monomeric TMR-A $\beta$ 42 indicating random coil nature of the monomers. However, TMR-A $\beta$  amyloids show a peak at 218 nm indicating  $\beta$ -sheet nature of the aggregates. Concentration of TMR-A $\beta$  used in these measurements is 5  $\mu$ M.

### Atomic force microscopy (AFM) imaging of TMR-A $\beta$ 42 amyloids:

Morphology of aggregates was characterized by AFM (AFM Workshop, USA). Aggregated TMR-A $\beta$ 42 were placed on a freshly peeled layer of mica, incubated for 5 min and washed with deionized water. The sample was dried overnight at RT. The AFM was operated in the tapping mode. Figure S1C shows that TMR-A $\beta$ 42 form both long fibrillar structures and small globular aggregates. Taken together TMR-A $\beta$ 42 used here shows aggregation behavior similar to that were reported previously (1).

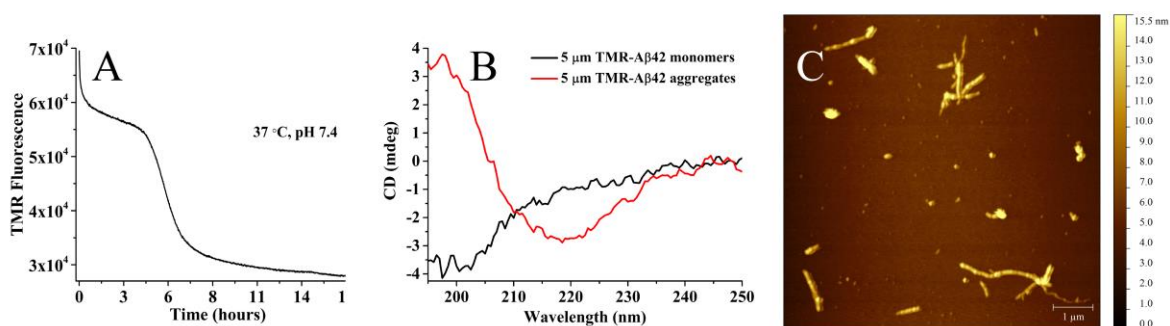

**Figure S1.** Characterization of aggregation of TMR-A $\beta$ 42. A) Kinetics of aggregation of TMR-A $\beta$ 42 monitored by TMR fluorescence. B) CD spectra of 5  $\mu$ M TMR-A $\beta$ 42, soluble (black solid line) and aggregated (red solid line) in 10 mM phosphate buffer, pH 7.4 at 25 °C. Clearly, TMR-A $\beta$  aggregates are rich in  $\beta$ -sheet structures. C) Morphology of TMR-A $\beta$ 42 aggregates observed by AFM. Both, long fibrillar aggregates and small globular species can be observed in AFM.

### Determination of hydrodynamic radii of the soluble TMR-A $\beta$ 42 using Fluorescence Correlation Spectroscopy (FCS)

Stock solution of monomeric TMR-A $\beta$ 42 was prepared by size exclusion chromatography purification using a Superdex peptide column (GE Healthcare) in 4 M GdnCl, containing 10 mM PBS (pH 7.4), 5 mM  $\beta$ -mercaptoethanol ( $\beta$ Me) and 1 mM EDTA. Only the monomeric fractions were collected to prepare the monomeric stock in 4 M GdnCl. The stock solution was diluted 200-fold to 25 nM final concentration in 0 or 4 M GdnCl containing 10 mM PBS with 5 mM  $\beta$ -Me, 1 mM EDTA, pH 7.4. FCS measurements were performed using a home built FCS set up. Hydrodynamic radii ( $R_h$ ) were calculated from the measured diffusion times of free rhodamine B and TMR-A $\beta$  (see equation 2 in the materials and methods section in the manuscript). The gray

and red bars in figure S2 represent  $R_h$  of the monomeric TMR-A $\beta$ 42 and the materials disaggregated from TMR-A $\beta$ 42 fibrils respectively. Clearly,  $R_h$  of the species formed upon disaggregation of fibrils are the same as the monomeric peptides at both 0 and 4 M GdnCl. These data indicate that in our disaggregation experiments TMR fluorescence arises from the monomeric peptides. Aggregated forms of TMR-A $\beta$ 42 have insignificant contribution to the fluorescence.

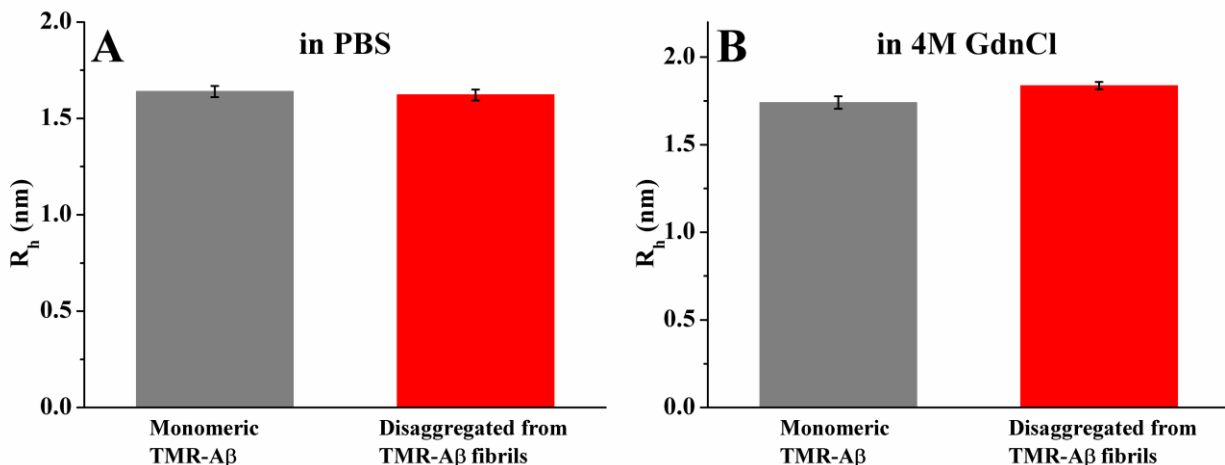

**Figure S2.** Hydrodynamic radii ( $R_h$ ) of TMR-A $\beta$ 42 monomers (gray bars) and the peptides disaggregated from TMR-A $\beta$ 42 fibrils (red bars) in PBS (A) and in 4M GdnCl (B). Clearly, the disaggregated species have the same  $R_h$  as the monomeric peptide.

### Relationship between $C_{\text{soluble}}$ and $C_{\text{total}}$ for tyrosine at different concentrations of GdnCl

A 50 mg/ml stock tyrosine solution was prepared in 10 mM PBS buffer, pH 7.4. Tyrosine is poorly soluble in PBS hence the stock obtained was turbid. This stock was vortexed to mix thoroughly, then diluted immediately to 0.3, 0.6, 1.2, 2.4 and 4.8 mg/ml final concentration in 1.1, 3.2 and 5.3 M GdnCl. These solutions were kept at room temperature for 4 h and then centrifuged at 16000 $\times$ g. The supernatants were separated carefully. Absorbance of the supernatants were measured using a spectrophotometer (Jasco). Supernatants were diluted appropriately prior to the measurements of absorbance to avoid artifacts that may arise due to inner filter effects at high concentrations of tyrosine. Soluble concentration of tyrosine was calculated using absorbance

value at 275 nm using extinction coefficient  $\epsilon = 1440 \text{ mol}^{-1}\text{cm}^{-1}$ . Figure S3 shows the plots of soluble concentration ( $C_{\text{soluble}}$ ) versus total concentration ( $C_{\text{total}}$ ) of tyrosine at various concentrations of GdnCl. It may be seen that these plots can be divided into two distinct regions: for  $C_{\text{total}} < C_{\text{sat}}$ ,  $C_{\text{soluble}} = C_{\text{total}}$  and for  $C_{\text{total}} > C_{\text{sat}}$ ,  $C_{\text{soluble}} = C_{\text{sat}}$  where the  $C_{\text{sat}}$  refers to saturation concentration. The  $C_{\text{sat}}$  of tyrosine are 0.7, 1.0 and 1.2 mg/ml in 1.1, 3.2 and 5.3 M GdnCl respectively. This behavior is expected for solutions in thermodynamic equilibrium.

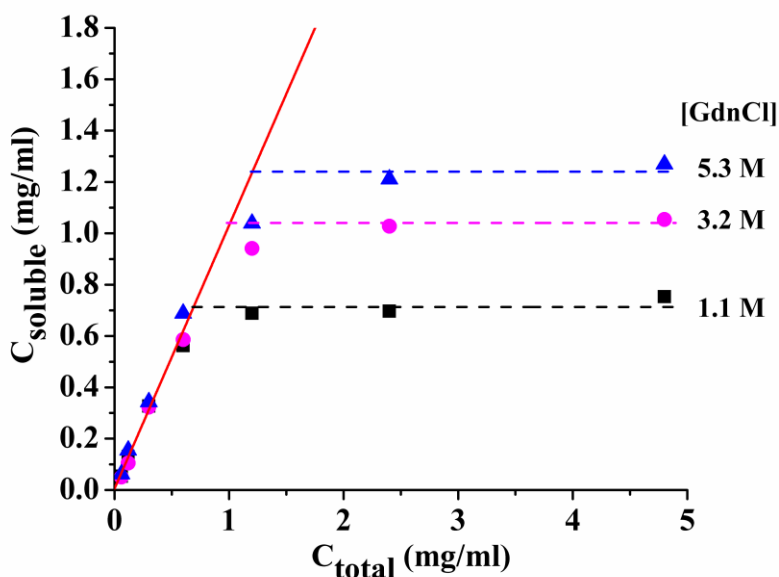

**Figure S3.** Soluble concentration ( $C_{\text{soluble}}$ ) as a function of total concentration ( $C_{\text{total}}$ ) of tyrosine measured in different concentrations of GdnCl. The solid red line corresponds to  $C_{\text{soluble}} = C_{\text{total}}$  and the dotted lines are linear fit of the data for  $C_{\text{total}} > C_{\text{sat}}$ .

### Relationship between $C_{\text{soluble}}$ and $C_{\text{total}}$ for TMR-A $\beta$ 42 fibrils prepared with progressive seeding

The denaturant dependent apparent solubility data with progressively seeded amyloids (see Figure 6) and analysis of the data using equation 5 (see Figure 7D) indicate that the heterogeneity of the fibrils reduces progressively with successive seeding. We now examine if progressive seeding can give rise to purely homogeneous fibrils. To test this, we examine the relationship between soluble concentration and total concentration (i.e.,  $C_{\text{soluble}}$  vs.  $C_{\text{total}}$ ) at 3 M GdnCl using TMR-A $\beta$ 42 amyloids prepared after 6<sup>th</sup> generation of serial seeding. Figure S4 shows that  $C_{\text{soluble}}$

increases linearly with  $C_{\text{total}}$  of the amyloids (i.e.,  $C_{\text{soluble}} \propto C_{\text{total}}$ ). This indicates that amyloids obtained even after 6<sup>th</sup> generation of seeding are not purely homogeneous.

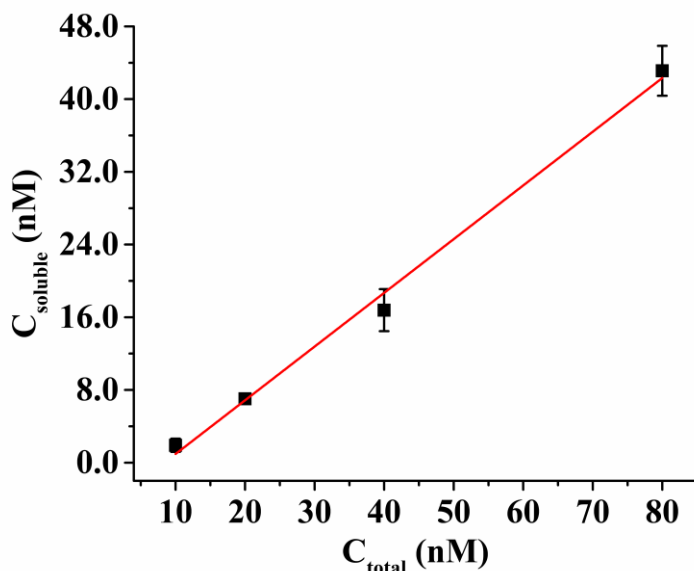

**Figure S4.** Soluble concentration as a function of total concentration of TMR-A $\beta$ 42 amyloids obtained after 6<sup>th</sup> generation of seeding. Aliquots (2, 4, 8 and 16  $\mu$ l) of 6  $\mu$ M stock of TMR-A $\beta$ 42 amyloids are diluted into PBS buffer containing 3 M GdnCl. Soluble concentrations of the amyloids are measured using fluorescence of TMR. Black squares represent the data and the solid red line is linear fit of the data.

#### **Summary of the values of $\langle\rho\rangle$ and $\sigma$ obtained from fitting of the denaturant dependent apparent solubility data using equation 5**

Table S1 and S2 summarize the values of  $\langle\rho\rangle$  and  $\sigma$  for amyloid aggregates obtained from analysis of the data presented in Figures 4A-C and 6 respectively using Eq. 5. The amyloids used for disaggregation have different preparation history, viz., different aggregation temperature, pH, ageing and with or without seeding. The distributions of  $\rho^*$  obtained are plotted in figure 7 in the manuscript. It may be seen from Table S1 that the mean ( $\langle\rho\rangle$ ) of the distributions increases with increasing temperature, pH, ageing indicating increase in stability. Table S2 shows that while the  $\langle\rho\rangle$  remains the same, the standard deviation ( $\sigma$ ) decreases with progressive seeding indicating decrease in heterogeneity of the amyloids.

**Table S1:** Mean kinetic stability ( $\langle\rho\rangle$ ) and heterogeneity ( $\sigma$ ) of the amyloids obtained from analysis of the data presented in Figures 4A-C.

| Figure no. | Temperature (°C) | pH  | Aging    | $\langle\rho\rangle$ (M of GdnCl) | $\sigma$ (M of GdnCl) |
|------------|------------------|-----|----------|-----------------------------------|-----------------------|
| 4A         | 25               | 7.4 | 2 days   | 3.42                              | 1.87                  |
| 4A         | 37               | 7.4 | 2 days   | 4.0                               | 2.26                  |
| 4B         | 37               | 7.4 | 24h      | 3.46                              | 1.70                  |
| 4B         | 37               | 5.7 | 24h      | 2.37                              | 0.91                  |
| 4C         | 37               | 7.4 | 2 days   | 2.6                               | 1.42                  |
| 4C         | 37               | 7.4 | 2 months | 4.73                              | 1.98                  |
| 4C         | 37               | 7.4 | 4 months | 6.73                              | 3.12                  |

**Table S2:** Effects of progressive seeding on mean kinetic stability ( $\langle\rho\rangle$ ) and heterogeneity ( $\sigma$ ) of the amyloids obtained from analysis of the data presented in Figure 6.

| No. of generations of serial seeding | $\langle\rho\rangle$ (M of GdnCl) | $\sigma$ (M of GdnCl) |
|--------------------------------------|-----------------------------------|-----------------------|
| 1                                    | 3.22±0.13                         | 1.69±0.11             |
| 3                                    | 3.26±0.05                         | 1.24±0.06             |
| 5                                    | 3.29±0.04                         | 1.01±0.05             |

**Reference:**

1. Garai, K., and C. Frieden. 2013. Quantitative analysis of the time course of A $\beta$  oligomerization and subsequent growth steps using tetramethylrhodamine-labeled A $\beta$ . Proc. Natl. Acad. Sci. USA. 110:3321-3326.
